# Supplementary material for: SISYPHUS—structural alignments for proteins with non-trivial relationships
Source: Oxford University Press journal article supplement (doi:10.1093/nar/gkl746), 2006-10-26
Supplement: gkl746_Supplementary_Data.zip [file gkl746_Supplementary_Data.zip]

Archive with 1 entries (1 files):
- gkl746_suppl.PDF
